# Supplementary material for: Synergistic influence of phosphorylation and metal ions on tau oligomer formation and coaggregation with α-synuclein at the single molecule level
Source: PubMed Central journal article supplement (PMC3472288; doi:10.1186/1750-1326-7-35), 2012-07-23
Supplement: 1750-1326-7-35-S1.pdf [file 1750-1326-7-35-S1.pdf]

**Table 1****SIFT analysis of pTau and mTau aggregation levels**

|             |           | <b>pTau</b> |         |       |           |
|-------------|-----------|-------------|---------|-------|-----------|
|             |           | TRIS        | DMSO 1% | Al    | DMSO + Al |
| <b>pTau</b> | TRIS      | 1,00        | 7,29    | 45,72 | 47,87     |
|             | DMSO 1%   | 0,14        | 1,00    | 6,27  | 6,56      |
|             | Al        | 0,02        | 0,16    | 1,00  | 1,05      |
|             | DMSO + Al | 0,02        | 0,15    | 0,96  | 1,00      |

|             |           | <b>pTau</b> |         |       |           |
|-------------|-----------|-------------|---------|-------|-----------|
|             |           | TRIS        | DMSO 1% | Al    | DMSO + Al |
| <b>mTau</b> | TRIS      | 0,22        | 1,60    | 10,03 | 10,50     |
|             | DMSO 1%   | 0,03        | 0,24    | 1,51  | 1,58      |
|             | Al        | 0,02        | 0,17    | 1,07  | 1,12      |
|             | DMSO + Al | 0,02        | 0,16    | 1,03  | 1,08      |

|             |           | <b>mTau</b> |         |      |           |
|-------------|-----------|-------------|---------|------|-----------|
|             |           | TRIS        | DMSO 1% | Al   | DMSO + Al |
| <b>mTau</b> | TRIS      | 1,00        | 6,65    | 9,34 | 9,75      |
|             | DMSO 1%   | 0,15        | 1,00    | 1,40 | 1,47      |
|             | Al        | 0,11        | 0,71    | 1,00 | 1,04      |
|             | DMSO + Al | 0,10        | 0,68    | 0,96 | 1,00      |

Table 1: Comparison of aggregation levels of phosphorylated (pTau) and mock phosphorylated (mTau) protein tau in presence of different aggregation inducers. SIFT data is presented as ratios (column / row). Measurements were taken from 15 independent samples, each sample was measured four times.
