# Supplementary material for: Synergistic influence of phosphorylation and metal ions on tau oligomer formation and coaggregation with α-synuclein at the single molecule level
Source: PubMed Central journal article supplement (PMC3472288; doi:10.1186/1750-1326-7-35), 2012-07-23
Supplement: 1750-1326-7-35-S2.pdf [file 1750-1326-7-35-S2.pdf]

**Table 2****Cross-correlation analysis of pTau and mTau aggregation levels**

|             |           | <b>pTau</b> |         |       |           |
|-------------|-----------|-------------|---------|-------|-----------|
|             |           | TRIS        | DMSO 1% | Al    | DMSO + Al |
| <b>pTau</b> | TRIS      | 1,000       | 2,542   | 355,6 | 378,8     |
|             | DMSO 1%   | 0,393       | 1,000   | 139,9 | 149,0     |
|             | Al        | 0,003       | 0,007   | 1,000 | 1,065     |
|             | DMSO + Al | 0,003       | 0,007   | 0,939 | 1,000     |

  

|             |           | <b>pTau</b> |         |       |           |
|-------------|-----------|-------------|---------|-------|-----------|
|             |           | TRIS        | DMSO 1% | Al    | DMSO + Al |
| <b>mTau</b> | TRIS      | 0,234       | 0,595   | 83,19 | 88,63     |
|             | DMSO 1%   | 0,065       | 0,166   | 23,29 | 24,81     |
|             | Al        | 0,004       | 0,011   | 1,484 | 1,580     |
|             | DMSO + Al | 0,004       | 0,009   | 1,253 | 1,334     |

  

|             |           | <b>mTau</b> |         |       |           |
|-------------|-----------|-------------|---------|-------|-----------|
|             |           | TRIS        | DMSO 1% | Al    | DMSO + Al |
| <b>mTau</b> | TRIS      | 1,000       | 3,572   | 56,08 | 66,42     |
|             | DMSO 10%  | 0,188       | 0,673   | 10,53 | 12,51     |
|             | DMSO 1%   | 0,280       | 1,000   | 15,70 | 18,59     |
|             | Al        | 0,018       | 0,064   | 1,000 | 1,184     |
|             | DMSO + Al | 0,015       | 0,054   | 0,844 | 1,000     |

Table 2: Comparison of aggregation levels of phosphorylated (pTau) and mock phosphorylated (mTau) protein tau in presence of different aggregation inducers. Cross-correlation data is presented as ratios (column / row). Measurements were taken from 15 independent samples, each sample was measured four times.
