# Supplementary material for: Synergistic influence of phosphorylation and metal ions on tau oligomer formation and coaggregation with α-synuclein at the single molecule level
Source: PubMed Central journal article supplement (PMC3472288; doi:10.1186/1750-1326-7-35), 2012-07-23
Supplement: 1750-1326-7-35-S4.pdf [file 1750-1326-7-35-S4.pdf]

**Table 3**

**SIFT analysis of pTau and mTau coaggregation levels with  $\alpha$ -syn**

|             |                         | <b>pTau</b> |         |       |        |         |         |
|-------------|-------------------------|-------------|---------|-------|--------|---------|---------|
|             |                         | TRIS        | DMSO 1% | Fe    | Al     | Fe+DMSO | Al+DMSO |
| <b>pTau</b> | TRIS                    | 1,000       | 403,6   | 146,4 | 1818,1 | 565,7   | 1784,5  |
|             | DMSO 1%                 | 0,002       | 1,000   | 0,363 | 4,505  | 1,402   | 4,421   |
|             | Fe 10 $\mu$ M           | 0,007       | 2,76    | 1,000 | 12,42  | 3,863   | 12,19   |
|             | Al 10 $\mu$ M           | 0,001       | 0,222   | 0,081 | 1,000  | 0,311   | 0,982   |
|             | Fe 10 $\mu$ M + DMSO 1% | 0,002       | 0,714   | 0,259 | 3,214  | 1,000   | 3,155   |
|             | Al 10 $\mu$ M + DMSO 1% | 0,001       | 0,226   | 0,082 | 1,019  | 0,317   | 1,000   |

  

|             |                         | <b>pTau</b> |         |       |        |         |         |
|-------------|-------------------------|-------------|---------|-------|--------|---------|---------|
|             |                         | TRIS        | DMSO 1% | Fe    | Al     | Fe+DMSO | Al+DMSO |
| <b>mTau</b> | TRIS                    | 0,668       | 269,5   | 97,78 | 1214,2 | 377,8   | 1191,7  |
|             | DMSO 1%                 | 0,002       | 0,834   | 0,303 | 3,758  | 1,169   | 3,689   |
|             | Fe 10 $\mu$ M           | 0,026       | 10,64   | 3,860 | 47,94  | 14,92   | 47,05   |
|             | Al 10 $\mu$ M           | 0,001       | 0,384   | 0,139 | 1,728  | 0,538   | 1,696   |
|             | Fe 10 $\mu$ M + DMSO 1% | 0,002       | 0,945   | 0,343 | 4,256  | 1,324   | 4,177   |
|             | Al 10 $\mu$ M + DMSO 1% | 0,001       | 0,268   | 0,097 | 1,207  | 0,375   | 1,184   |

  

|             |                         | <b>mTau</b> |         |       |       |         |         |
|-------------|-------------------------|-------------|---------|-------|-------|---------|---------|
|             |                         | TRIS        | DMSO 1% | Fe    | Al    | Fe+DMSO | Al+DMSO |
| <b>mTau</b> | TRIS                    | 1,000       | 323,1   | 25,33 | 702,5 | 285,3   | 1006,2  |
|             | DMSO 1%                 | 0,003       | 1,000   | 0,078 | 2,174 | 0,883   | 3,114   |
|             | Fe 10 $\mu$ M           | 0,039       | 12,76   | 1,000 | 27,74 | 11,26   | 39,73   |
|             | Al 10 $\mu$ M           | 0,001       | 0,460   | 0,036 | 1,000 | 0,406   | 1,432   |
|             | Fe 10 $\mu$ M + DMSO 1% | 0,004       | 1,133   | 0,089 | 2,463 | 1,000   | 3,527   |
|             | Al 10 $\mu$ M + DMSO 1% | 0,001       | 0,321   | 0,025 | 0,698 | 0,284   | 1,000   |

Table 3: Comparison of coaggregation levels of phosphorylated (pTau) and mock phosphorylated (mTau) protein tau with  $\alpha$ -synuclein in presence of different aggregation inducers. SIFT data is presented as ratios (column / row). Measurements were taken from 16 independent samples, each sample was measured four times.
