# Supplementary material for: Synergistic influence of phosphorylation and metal ions on tau oligomer formation and coaggregation with α-synuclein at the single molecule level
Source: PubMed Central journal article supplement (PMC3472288; doi:10.1186/1750-1326-7-35), 2012-07-23
Supplement: 1750-1326-7-35-S5.pdf [file 1750-1326-7-35-S5.pdf]

Table 4

Cross-correlation analysis of pTau and mTau coaggregation levels with  $\alpha$ -syn

|      |                         | pTau  |         |       |        |         |         |
|------|-------------------------|-------|---------|-------|--------|---------|---------|
|      |                         | TRIS  | DMSO 1% | Fe    | Al     | Fe+DMSO | Al+DMSO |
| pTau | TRIS                    | 1,000 | 36,16   | 30,54 | 1158,2 | 225,3   | 1821,7  |
|      | DMSO 1%                 | 0,028 | 1,000   | 0,845 | 32,04  | 6,233   | 50,39   |
|      | Fe 10 $\mu$ M           | 0,033 | 1,184   | 1,000 | 37,92  | 7,378   | 59,65   |
|      | Al 10 $\mu$ M           | 0,001 | 0,031   | 0,026 | 1,000  | 0,195   | 1,573   |
|      | Fe 10 $\mu$ M + DMSO 1% | 0,004 | 0,160   | 0,136 | 5,140  | 1,000   | 8,085   |
|      | Al 10 $\mu$ M + DMSO 1% | 0,001 | 0,020   | 0,017 | 0,636  | 0,124   | 1,000   |

  

|      |                         | pTau  |         |       |       |         |         |
|------|-------------------------|-------|---------|-------|-------|---------|---------|
|      |                         | TRIS  | DMSO 1% | Fe    | Al    | Fe+DMSO | Al+DMSO |
| mTau | TRIS                    | 0,717 | 25,91   | 21,89 | 830,0 | 161,5   | 1305,4  |
|      | DMSO 1%                 | 0,025 | 0,918   | 0,775 | 29,41 | 5,721   | 46,25   |
|      | Fe 10 $\mu$ M           | 0,208 | 7,508   | 6,343 | 240,5 | 46,80   | 378,3   |
|      | Al 10 $\mu$ M           | 0,003 | 0,117   | 0,099 | 3,748 | 0,729   | 5,895   |
|      | Fe 10 $\mu$ M + DMSO 1% | 0,005 | 0,196   | 0,165 | 6,266 | 1,219   | 9,855   |
|      | Al 10 $\mu$ M + DMSO 1% | 0,001 | 0,029   | 0,025 | 0,934 | 0,182   | 1,469   |

  

|      |                         | mTau  |         |       |       |         |         |
|------|-------------------------|-------|---------|-------|-------|---------|---------|
|      |                         | TRIS  | DMSO 1% | Fe    | Al    | Fe+DMSO | Al+DMSO |
| mTau | TRIS                    | 1,000 | 28,23   | 3,451 | 221,5 | 132,5   | 888,4   |
|      | DMSO 1%                 | 0,035 | 1,000   | 0,122 | 7,846 | 4,693   | 31,48   |
|      | Fe 10 $\mu$ M           | 0,290 | 8,180   | 1,000 | 64,18 | 38,39   | 257,5   |
|      | Al 10 $\mu$ M           | 0,005 | 0,127   | 0,016 | 1,000 | 0,598   | 4,012   |
|      | Fe 10 $\mu$ M + DMSO 1% | 0,008 | 0,213   | 0,026 | 1,672 | 1,000   | 6,707   |
|      | Al 10 $\mu$ M + DMSO 1% | 0,001 | 0,032   | 0,004 | 0,249 | 0,149   | 1,000   |

Table 4: Comparison of coaggregation levels of phosphorylated (pTau) and mock phosphorylated (mTau) protein tau with  $\alpha$ -synuclein in presence of different aggregation inducers. Cross-correlation data is presented as ratios (column / row). Measurements were taken from 16 independent samples, each sample was measured four times.
