# Supplementary material for: Synergistic influence of phosphorylation and metal ions on tau oligomer formation and coaggregation with α-synuclein at the single molecule level
Source: PubMed Central journal article supplement (PMC3472288; doi:10.1186/1750-1326-7-35), 2012-07-23
Supplement: 1750-1326-7-35-S6.pdf [file 1750-1326-7-35-S6.pdf]

A.

tau monomer +  $\alpha$ -syn monomer

|                               |      | $T_0$ (before SDS) |                              | $T_{100}$ (after SDS) |                              |
|-------------------------------|------|--------------------|------------------------------|-----------------------|------------------------------|
|                               |      | tau <sup>488</sup> | $\alpha$ -syn <sup>647</sup> | tau <sup>488</sup>    | $\alpha$ -syn <sup>647</sup> |
| <b>control</b>                | mTau | -                  | -                            | -                     | -                            |
|                               | pTau | -                  | -                            | -                     | -                            |
| <b>DMSO</b>                   | mTau | 15                 | 12                           | -                     | -                            |
|                               | pTau | 11                 | 8                            | -                     | -                            |
| <b>Fe<sup>3+</sup></b>        | mTau | 39                 | 3                            | 54                    | 25                           |
|                               | pTau | 53                 | 10                           | 77                    | 59                           |
| <b>Al<sup>3+</sup></b>        | mTau | 137                | 80                           | 92                    | 82                           |
|                               | pTau | 131                | 115                          | 98                    | 113                          |
| <b>Fe<sup>3+</sup> + DMSO</b> | mTau | 45                 | 29                           | 81                    | 56                           |
|                               | pTau | 67                 | 44                           | 94                    | 94                           |
| <b>Al<sup>3+</sup> + DMSO</b> | mTau | 132                | 88                           | 94                    | 120                          |
|                               | pTau | 127                | 104                          | 110                   | 106                          |

B.

tau oligomer +  $\alpha$ -syn monomer

|                               |      | $T_0$ (before SDS) |                              | $T_{100}$ (after SDS) |                              |
|-------------------------------|------|--------------------|------------------------------|-----------------------|------------------------------|
|                               |      | tau <sup>488</sup> | $\alpha$ -syn <sup>647</sup> | tau <sup>488</sup>    | $\alpha$ -syn <sup>647</sup> |
| <b>control</b>                | mTau | -                  | -                            | -                     | -                            |
|                               | pTau | -                  | -                            | -                     | -                            |
| <b>DMSO</b>                   | mTau | 27                 | 5                            | -                     | -                            |
|                               | pTau | 20                 | 2                            | -                     | -                            |
| <b>Fe<sup>3+</sup></b>        | mTau | 175                | 3                            | 81                    | 3                            |
|                               | pTau | 197                | 14                           | 87                    | 17                           |
| <b>Al<sup>3+</sup></b>        | mTau | 154                | 35                           | 92                    | 37                           |
|                               | pTau | 151                | 73                           | 88                    | 116                          |
| <b>Fe<sup>3+</sup> + DMSO</b> | mTau | 206                | 29                           | 111                   | 47                           |
|                               | pTau | 187                | 33                           | 110                   | 54                           |
| <b>Al<sup>3+</sup> + DMSO</b> | mTau | 155                | 65                           | 85                    | 64                           |
|                               | pTau | 151                | 83                           | 85                    | 109                          |

C.

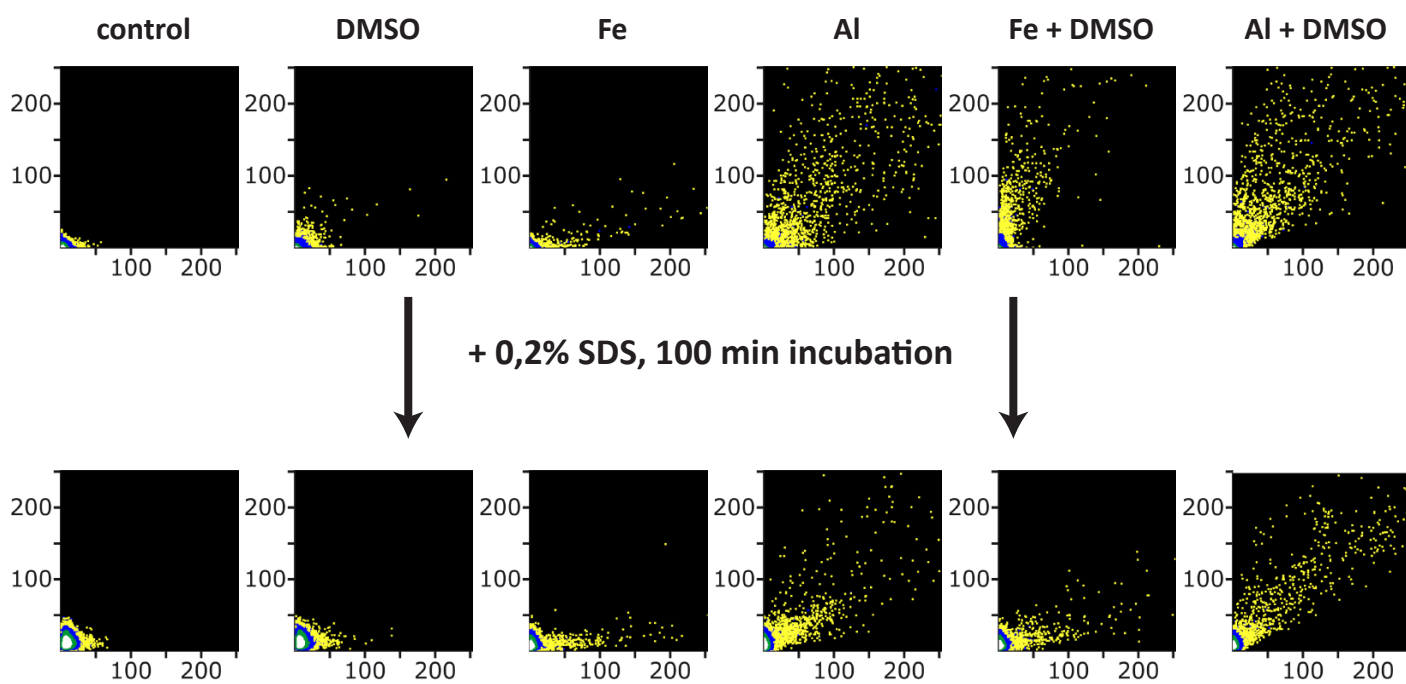

**supp. figure 2:** FIDA (fluorescence intensity distribution analysis) of SDS-stable mixed tau<sup>488</sup> and  $\alpha$ -syn<sup>647</sup> oligomers. A. Coaggregation of tau and  $\alpha$ -syn in presence of different aggregation inducers. Oligomer size is presented as monomers per oligomer for tau<sup>488</sup> and  $\alpha$ -syn<sup>647</sup> before ( $T_0$ ) and after ( $T_{100}$ ) incubation with 0.2% SDS for 100 minutes. Oligomer size was calculated by FIDA analysis (assuming no quenching-effects in oligomers) if the presence of oligomers was indicated by cross-correlation data. B. Coaggregation of pre-formed tau<sup>488</sup> oligomers and  $\alpha$ -syn<sup>647</sup> monomers. Oligomer size is presented as monomers per oligomer for tau and  $\alpha$ -syn<sup>647</sup>. C. SIFT-2D histograms depicting the presence of mixed pTau<sup>488</sup> and  $\alpha$ -syn<sup>647</sup> oligomers before and after incubation with 0.2% SDS for 100 minutes.
