# Supplementary material for: Synergistic influence of phosphorylation and metal ions on tau oligomer formation and coaggregation with α-synuclein at the single molecule level
Source: PubMed Central journal article supplement (PMC3472288; doi:10.1186/1750-1326-7-35), 2012-07-23
Supplement: 1750-1326-7-35-S8.pdf [file 1750-1326-7-35-S8.pdf]

Table 5

SIFT analysis of coaggregation levels of pTau and mTau oligomers with monomeric  $\alpha$ -syn

|      |                         | pTau   |         |        |        |         |         |
|------|-------------------------|--------|---------|--------|--------|---------|---------|
|      |                         | TRIS   | DMSO 1% | Fe     | Al     | Fe+DMSO | Al+DMSO |
| pTau | TRIS                    | 1,0000 | 37,03   | 338,4  | 2152,1 | 745,9   | 2777,5  |
|      | DMSO 1%                 | 0,0270 | 1,0000  | 9,137  | 58,13  | 20,15   | 75,02   |
|      | Fe 10 $\mu$ M           | 0,0030 | 0,1094  | 1,0000 | 6,360  | 2,204   | 8,209   |
|      | Al 10 $\mu$ M           | 0,0005 | 0,0172  | 0,1572 | 1,0000 | 0,3466  | 1,291   |
|      | Fe 10 $\mu$ M + DMSO 1% | 0,0013 | 0,0496  | 0,4536 | 2,885  | 1,0000  | 3,724   |
|      | Al 10 $\mu$ M + DMSO 1% | 0,0004 | 0,0133  | 0,1218 | 0,7748 | 0,2685  | 1,0000  |
|      |                         | pTau   |         |        |        |         |         |
|      |                         | TRIS   | DMSO 1% | Fe     | Al     | Fe+DMSO | Al+DMSO |
| mTau | TRIS                    | 0,5103 | 18,89   | 172,7  | 1098,2 | 380,6   | 1417,3  |
|      | DMSO 1%                 | 0,0027 | 0,0998  | 0,9119 | 5,800  | 2,010   | 7,486   |
|      | Fe 10 $\mu$ M           | 0,0118 | 0,4374  | 3,997  | 25,42  | 8,812   | 32,81   |
|      | Al 10 $\mu$ M           | 0,0097 | 0,3610  | 3,299  | 20,98  | 7,272   | 27,08   |
|      | Fe 10 $\mu$ M + DMSO 1% | 0,0015 | 0,0562  | 0,5136 | 3,267  | 1,132   | 4,216   |
|      | Al 10 $\mu$ M + DMSO 1% | 0,0006 | 0,0240  | 0,2190 | 1,393  | 0,4827  | 1,797   |
|      |                         | mTau   |         |        |        |         |         |
|      |                         | TRIS   | DMSO 1% | Fe     | Al     | Fe+DMSO | Al+DMSO |
| mTau | TRIS                    | 1,0000 | 189,3   | 43,19  | 52,34  | 336,1   | 788,6   |
|      | DMSO 1%                 | 0,0053 | 1,0000  | 0,2281 | 0,2764 | 1,775   | 4,165   |
|      | Fe 10 $\mu$ M           | 0,0232 | 4,383   | 1,0000 | 1,212  | 7,782   | 18,26   |
|      | Al 10 $\mu$ M           | 0,0191 | 3,618   | 0,8253 | 1,0000 | 6,423   | 15,07   |
|      | Fe 10 $\mu$ M + DMSO 1% | 0,0030 | 0,5632  | 0,1285 | 0,1557 | 1,0000  | 2,346   |
|      | Al 10 $\mu$ M + DMSO 1% | 0,0013 | 0,2401  | 0,0548 | 0,0664 | 0,4263  | 1,0000  |

Table 5: Comparison of coaggregation levels of phosphorylated (pTau) and mock phosphorylated (mTau) tau oligomers with monomeric  $\alpha$ -synuclein in presence of different aggregation inducers. SIFT data is presented as ratios (column / row). Measurements were taken from 20 independent samples, each sample was measured four times.
