# Supplementary material for: Synergistic influence of phosphorylation and metal ions on tau oligomer formation and coaggregation with α-synuclein at the single molecule level
Source: PubMed Central journal article supplement (PMC3472288; doi:10.1186/1750-1326-7-35), 2012-07-23
Supplement: 1750-1326-7-35-S9.pdf [file 1750-1326-7-35-S9.pdf]

Table 6

Cross-correlation analysis of coaggregation levels of pTau and mTau oligomers with monomeric  $\alpha$ -syn

|             |                         | pTau   |         |        |        |         |         |
|-------------|-------------------------|--------|---------|--------|--------|---------|---------|
|             |                         | TRIS   | DMSO 1% | Fe     | Al     | Fe+DMSO | Al+DMSO |
| <b>pTau</b> | TRIS                    | 1,0000 | 7,208   | 93,22  | 1702,1 | 454,7   | 2813,8  |
|             | DMSO 1%                 | 0,1387 | 1,0000  | 12,93  | 236,2  | 63,09   | 390,4   |
|             | Fe 10 $\mu$ M           | 0,0107 | 0,0773  | 1,0000 | 18,26  | 4,88    | 30,19   |
|             | Al 10 $\mu$ M           | 0,0006 | 0,0042  | 0,0548 | 1,0000 | 0,2672  | 1,653   |
|             | Fe 10 $\mu$ M + DMSO 1% | 0,0022 | 0,0159  | 0,2050 | 3,743  | 1,0000  | 6,188   |
|             | Al 10 $\mu$ M + DMSO 1% | 0,0004 | 0,0026  | 0,0331 | 0,6049 | 0,1616  | 1,0000  |

  

|             |                         | pTau   |         |        |        |         |         |
|-------------|-------------------------|--------|---------|--------|--------|---------|---------|
|             |                         | TRIS   | DMSO 1% | Fe     | Al     | Fe+DMSO | Al+DMSO |
| <b>mTau</b> | TRIS                    | 0,6850 | 4,938   | 63,86  | 1166,0 | 311,5   | 1927,6  |
|             | DMSO 1%                 | 0,0273 | 0,1964  | 2,541  | 46,39  | 12,39   | 76,69   |
|             | Fe 10 $\mu$ M           | 0,0934 | 0,6735  | 8,710  | 159,1  | 42,49   | 262,9   |
|             | Al 10 $\mu$ M           | 0,0044 | 0,0319  | 0,4125 | 7,532  | 2,012   | 12,45   |
|             | Fe 10 $\mu$ M + DMSO 1% | 0,0026 | 0,0184  | 0,2381 | 4,347  | 1,161   | 7,186   |
|             | Al 10 $\mu$ M + DMSO 1% | 0,0007 | 0,0050  | 0,0647 | 1,182  | 0,3158  | 1,954   |

  

|             |                         | mTau   |         |        |        |         |         |
|-------------|-------------------------|--------|---------|--------|--------|---------|---------|
|             |                         | TRIS   | DMSO 1% | Fe     | Al     | Fe+DMSO | Al+DMSO |
| <b>mTau</b> | TRIS                    | 1,0000 | 25,14   | 7,331  | 154,8  | 268,2   | 986,6   |
|             | DMSO 1%                 | 0,0398 | 1,0000  | 0,2917 | 6,159  | 10,67   | 39,25   |
|             | Fe 10 $\mu$ M           | 0,1364 | 3,429   | 1,0000 | 21,12  | 36,59   | 134,6   |
|             | Al 10 $\mu$ M           | 0,0065 | 0,1624  | 0,0474 | 1,0000 | 1,733   | 6,373   |
|             | Fe 10 $\mu$ M + DMSO 1% | 0,0037 | 0,0937  | 0,0273 | 0,5771 | 1,0000  | 3,678   |
|             | Al 10 $\mu$ M + DMSO 1% | 0,0010 | 0,0255  | 0,0074 | 0,1569 | 0,2719  | 1,0000  |

Table 6: Comparison of coaggregation levels of phosphorylated (pTau) and mock phosphorylated (mTau) tau oligomers with monomeric  $\alpha$ -synuclein in presence of different aggregation inducers. Cross-correlation data is presented as ratios (column / row). Measurements were taken from 20 independent samples, each sample was measured four times.
